# Supplementary material
Source: PubMed Central journal article supplement (PMC4334728)
Supplement: NIHMS655955-supplement-Supplemental_Table_1.pdf [file NIHMS655955-supplement-Supplemental_Table_1.pdf]

Supplemental Material, Table S1

Supplemental Material, Table S1. Stratum-specific estimates (OR, 95% CI) and relative excess risk due to interaction (RERI, 95% CI) for each SNP-lead association using single-referent coding, adjusting for education and ancestry

| Chr.                 | Gene*                         | rs number | Lead Exposure | SNP                | OR (95% CI)        | PD                   | RERI (95% CI)        |
|----------------------|-------------------------------|-----------|---------------|--------------------|--------------------|----------------------|----------------------|
| 5                    | <i>IL7R</i>                   | rs6897932 | No            | No                 | 1.00               |                      |                      |
|                      |                               |           | Yes           | No                 | 1.12 (0.73, 1.72)  | 0.12                 |                      |
|                      |                               |           | Yes           | Yes                | 2.19 (1.00, 4.82)  |                      |                      |
| 6                    | <i>TNF<math>\alpha</math></i> | rs1799964 | No            | No                 | 1.00               |                      |                      |
|                      |                               |           | Yes           | No                 | 2.06 (0.78, 5.48)  | -0.13                | -0.25 (-2.68, 2.18)  |
|                      |                               |           | Yes           | Yes                | 2.56 (1.17, 5.58)  |                      |                      |
|                      |                               | rs1800629 | No            | No                 | 1.00               |                      |                      |
|                      |                               |           | Yes           | No                 | 1.69 (0.62, 4.58)  | -0.87                | -1.10 (-3.54, 1.35)  |
|                      |                               |           | Yes           | Yes                | 1.86 (0.92, 3.76)  |                      |                      |
|                      | <i>TNF<math>\beta</math></i>  | rs3093671 | No            | No                 | 1.00               |                      |                      |
|                      |                               |           | Yes           | No                 | 2.47 (0.65, 9.43)  | 0.62                 | 0.77 (-2.68, 4.22)   |
|                      |                               |           | Yes           | Yes                | 0.65 (0.12, 3.45)  | -0.35                |                      |
|                      |                               | rs769178  | No            | No                 | 1.00               |                      |                      |
|                      |                               |           | Yes           | No                 | 1.64 (0.82, 3.26)  | -2.62                | -2.27 (-4.41, -0.13) |
|                      |                               |           | Yes           | Yes                | 4.05 (1.04, 15.75) | 2.42                 | 2.90 (-2.47, 8.26)   |
|                      | rs769177                      | No        | No            | 1.00               |                    |                      |                      |
|                      |                               | Yes       | No            | 0.59 (0.19, 1.87)  | -0.41              |                      |                      |
|                      |                               | Yes       | Yes           | 2.14 (1.09, 4.21)  |                    |                      |                      |
| rs909253             |                               | No        | No            | 1.00               |                    |                      |                      |
|                      |                               | Yes       | No            | 0.00 (0.00, 0.00)  | -2.14              | -1.73 (-3.38, -0.08) |                      |
|                      |                               | Yes       | Yes           | 0.63 (0.39, 1.00)  | -0.37              |                      |                      |
| <i>HLA-DRB1*1501</i> | rs3135388                     | No        | No            | 1.00               |                    |                      |                      |
|                      |                               | Yes       | No            | 1.83 (0.67, 5.03)  | 0.33               | 0.71 (-1.31, 2.73)   |                      |
|                      |                               | Yes       | Yes           | 3.64 (2.20, 6.01)  | 2.64               |                      |                      |
|                      | rs9471958                     | No        | No            | 1.00               |                    |                      |                      |
|                      |                               | Yes       | No            | 2.09 (0.84, 5.19)  | 4.04               | 1.40 (-3.87, 6.67)   |                      |
|                      |                               | Yes       | Yes           | 6.12 (2.48, 15.13) |                    |                      |                      |
| <i>PTCRA</i>         | rs6901007                     | No        | No            | 1.00               |                    |                      |                      |
|                      |                               | Yes       | No            | 0.92 (0.59, 1.42)  | -0.08              |                      |                      |
|                      |                               | Yes       | Yes           | 1.91 (0.86, 4.25)  |                    |                      |                      |
|                      | rs6901007                     | No        | No            | 1.00               |                    |                      |                      |
|                      |                               | Yes       | No            | 1.98 (0.76, 5.12)  | 0.06               | 0.15 (-2.03, 2.32)   |                      |
|                      |                               | Yes       | Yes           | 0.98 (0.61, 1.58)  | -0.02              |                      |                      |
|                      |                               |           | No            | No                 | 2.02 (0.63, 6.49)  |                      |                      |
|                      |                               |           | Yes           | Yes                | 2.01 (0.94, 4.31)  | -0.01                | 0.01 (-2.54, 2.56)   |

Supplemental Material, Table S1

| Chr.      | Gene*        | rs number         | Lead               |                   | OR (95% CI)        | PD                  | RERI (95% CI)      |                     |       |  |
|-----------|--------------|-------------------|--------------------|-------------------|--------------------|---------------------|--------------------|---------------------|-------|--|
|           |              |                   | Exposure           | SNP               |                    |                     |                    |                     |       |  |
| 7         | <i>TCA-β</i> | rs17133575        | No                 | No                | 1.00               |                     |                    |                     |       |  |
|           |              |                   |                    | Yes               | 1.12 (0.68, 1.82)  | 0.12                |                    |                     |       |  |
|           |              |                   | Yes                | No                | 2.12 (1.00, 4.50)  |                     |                    |                     |       |  |
|           |              |                   | Yes                | 1.76 (0.63, 4.98) | -0.35              | -0.47 (-2.64, 1.70) |                    |                     |       |  |
|           |              | rs17243           | No                 | No                | 1.00               |                     |                    |                     |       |  |
|           |              |                   |                    | Yes               | 0.62 (0.38, 1.03)  | -0.38               |                    |                     |       |  |
| Yes       | No           |                   | 0.82 (0.29, 2.34)  |                   |                    |                     |                    |                     |       |  |
|           |              |                   |                    | Yes               | 2.05 (0.90, 4.67)  | 1.23                | 1.61 (-0.02, 3.24) |                     |       |  |
|           |              |                   | 10                 | <i>IL2RA</i>      | rs2104286          | No                  | No                 | 1.00                |       |  |
|           |              |                   |                    |                   |                    |                     | Yes                | 0.98 (0.62, 1.55)   | -0.02 |  |
| Yes       | No           | 2.25 (0.94, 5.39) |                    |                   |                    |                     |                    |                     |       |  |
|           |              |                   | Yes                | 1.70 (0.68, 4.25) | -0.55              | -0.53 (-2.81, 1.76) |                    |                     |       |  |
| 12        | <i>VDR</i>   | rs7975128         | No                 | No                | 1.00               |                     |                    |                     |       |  |
|           |              |                   |                    | Yes               | 0.96 (0.59, 1.56)  | -0.04               |                    |                     |       |  |
|           |              |                   | Yes                | No                | 1.86 (0.65, 5.29)  |                     |                    |                     |       |  |
|           |              |                   | Yes                | 2.01 (0.94, 4.31) | 0.15               | 0.19 (-1.86, 2.24)  |                    |                     |       |  |
|           |              | rs2248098         | No                 | No                | 1.00               |                     |                    |                     |       |  |
|           |              |                   |                    | Yes               | 1.28 (0.73, 2.23)  | 0.28                |                    |                     |       |  |
|           |              |                   | Yes                | No                | 2.87 (0.82, 10.10) |                     |                    |                     |       |  |
|           |              |                   |                    |                   | Yes                | 2.46 (1.04, 5.82)   | -0.42              | -0.69 (-4.38, 2.99) |       |  |
|           |              | rs2239182         | No                 | No                | 1.00               |                     |                    |                     |       |  |
|           |              |                   |                    | Yes               | 1.44 (0.83, 2.51)  | 0.44                |                    |                     |       |  |
|           |              |                   | Yes                | No                | 5.34 (1.49, 19.10) |                     |                    |                     |       |  |
|           |              |                   |                    |                   | Yes                | 2.40 (1.03, 5.60)   | -2.94              | -3.38 (-9.90, 3.14) |       |  |
|           |              | rs2107301         | No                 | No                | 1.00               |                     |                    |                     |       |  |
|           |              |                   |                    | Yes               | 1.56 (0.97, 2.50)  | 0.56                |                    |                     |       |  |
|           |              |                   | Yes                | No                | 3.50 (1.56, 7.82)  |                     |                    |                     |       |  |
|           |              |                   |                    |                   | Yes                | 1.61 (0.61, 4.23)   | -1.89              | -2.45 (-5.40, 0.50) |       |  |
|           |              | rs1540339         | No                 | No                | 1.00               |                     |                    |                     |       |  |
|           |              |                   |                    | Yes               | 1.35 (0.83, 2.18)  | 0.35                |                    |                     |       |  |
|           |              |                   | Yes                | No                | 3.84 (1.52, 9.70)  |                     |                    |                     |       |  |
|           |              |                   |                    |                   | Yes                | 1.64 (0.67, 4.00)   | -2.20              | -2.55 (-6.12, 1.02) |       |  |
|           |              | rs2239179         | No                 | No                | 1.00               |                     |                    |                     |       |  |
|           |              |                   |                    | Yes               | 0.94 (0.59, 1.51)  | -0.06               |                    |                     |       |  |
|           |              |                   | Yes                | No                | 2.07 (0.71, 6.05)  |                     |                    |                     |       |  |
|           |              |                   |                    |                   | Yes                | 1.91 (0.89, 4.11)   | -0.16              | -0.10 (-2.42, 2.22) |       |  |
| rs2189480 | No           | No                | 1.00               |                   |                    |                     |                    |                     |       |  |
|           |              | Yes               | 1.44 (0.89, 2.32)  | 0.44              |                    |                     |                    |                     |       |  |
|           | Yes          | No                | 4.35 (1.64, 11.56) |                   |                    |                     |                    |                     |       |  |
|           |              |                   | Yes                | 1.85 (0.79, 4.33) | -2.50              | -2.94 (-7.22, 1.34) |                    |                     |       |  |
| rs3819545 | No           | No                | 1.00               |                   |                    |                     |                    |                     |       |  |
|           |              | Yes               | 1.28 (0.79, 2.08)  | 0.28              |                    |                     |                    |                     |       |  |
|           | Yes          | No                | 4.48 (1.64, 12.26) |                   |                    |                     |                    |                     |       |  |

Supplemental Material, Table S1

| Chr. | Gene* | rs number  | Lead     |     | OR (95% CI)       | PD    | RERI (95% CI)       |
|------|-------|------------|----------|-----|-------------------|-------|---------------------|
|      |       |            | Exposure | SNP |                   |       |                     |
|      |       |            |          | Yes | 1.75 (0.76, 4.06) | -2.72 | -3.00 (-7.46, 1.46) |
|      |       | rs3782905  | No       | No  | 1.00              |       |                     |
|      |       |            |          | Yes | 0.82 (0.52, 1.30) | -0.18 |                     |
|      |       |            | Yes      | No  | 1.30 (0.51, 3.32) |       |                     |
|      |       |            |          | Yes | 2.29 (1.03, 5.09) | 0.98  | 1.16 (-0.71, 3.03)  |
|      |       | rs2239186  | No       | No  | 1.00              |       |                     |
|      |       |            |          | Yes | 1.11 (0.68, 1.82) | 0.11  |                     |
|      |       |            | Yes      | No  | 2.28 (1.03, 5.04) |       |                     |
|      |       |            |          | Yes | 1.90 (0.68, 5.25) | -0.38 | -0.50 (-2.94, 1.95) |
|      |       | rs2228570  | No       | No  | 1.00              |       |                     |
|      |       |            |          | Yes | 0.88 (0.55, 1.40) | -0.12 |                     |
|      |       |            | Yes      | No  | 1.99 (0.74, 5.31) |       |                     |
|      |       |            |          | Yes | 1.68 (0.71, 3.98) | -0.30 | -0.18 (-2.40, 2.03) |
|      |       | rs2254210  | No       | No  | 1.00              |       |                     |
|      |       |            |          | Yes | 0.92 (0.57, 1.46) | -0.08 |                     |
|      |       |            | Yes      | No  | 1.85 (0.74, 4.61) |       |                     |
|      |       |            |          | Yes | 1.95 (0.86, 4.47) | 0.11  | 0.19 (-1.86, 2.24)  |
|      |       | rs2238136  | No       | No  | 1.00              |       |                     |
|      |       |            |          | Yes | 1.11 (0.70, 1.78) | 0.11  |                     |
|      |       |            | Yes      | No  | 2.50 (1.11, 5.66) |       |                     |
|      |       |            |          | Yes | 1.69 (0.66, 4.29) | -0.82 | -0.93 (-3.22, 1.36) |
|      |       | rs2853564  | No       | No  | 1.00              |       |                     |
|      |       |            |          | Yes | 1.03 (0.63, 1.68) | 0.03  |                     |
|      |       |            | Yes      | No  | 1.54 (0.58, 4.08) |       |                     |
|      |       |            |          | Yes | 2.59 (1.14, 5.88) | 1.05  | 1.03 (-1.21, 3.27)  |
|      |       | rs4760648  | No       | No  | 1.00              |       |                     |
|      |       |            |          | Yes | 1.08 (0.67, 1.72) | 0.08  |                     |
|      |       |            | Yes      | No  | 2.22 (0.64, 7.68) |       |                     |
|      |       |            |          | Yes | 1.96 (0.88, 4.39) | -0.25 | -0.33 (-3.26, 2.60) |
|      |       | rs11168287 | No       | No  | 1.00              |       |                     |
|      |       |            |          | Yes | 1.37 (0.80, 2.36) | 0.37  |                     |
|      |       |            | Yes      | No  | 2.64 (0.78, 8.90) |       |                     |
|      |       |            |          | Yes | 2.64 (1.14, 6.07) | 0.00  | -0.37 (-3.71, 2.96) |
|      |       | rs4328262  | No       | No  | 1.00              |       |                     |
|      |       |            |          | Yes | 1.30 (0.78, 2.15) | 0.30  |                     |
|      |       |            | Yes      | No  | 2.58 (0.91, 7.30) |       |                     |
|      |       |            |          | Yes | 2.47 (1.07, 5.70) | -0.11 | -0.41 (-3.36, 2.55) |
|      |       | rs4237855  | No       | No  | 1.00              |       |                     |
|      |       |            |          | Yes | 0.89 (0.55, 1.44) | -0.11 |                     |
|      |       |            | Yes      | No  | 2.17 (0.82, 5.72) |       |                     |
|      |       |            |          | Yes | 1.78 (0.79, 4.00) | -0.39 | -0.28 (-2.51, 1.96) |
|      |       | rs7136534  | No       | No  | 1.00              |       |                     |
|      |       |            |          | Yes | 1.50 (0.95, 2.38) | 0.50  |                     |

Supplemental Material, Table S1

| Chr.       | Gene*      | rs number | Lead               |       | OR (95% CI)         | PD    | RERI (95% CI)       |
|------------|------------|-----------|--------------------|-------|---------------------|-------|---------------------|
|            |            |           | Exposure           | SNP   |                     |       |                     |
| 18         | <i>MBP</i> | rs7299460 | Yes                | No    | 3.39 (1.42, 8.08)   |       |                     |
|            |            |           |                    | Yes   | 1.77 (0.70, 4.46)   | -1.62 | -2.12 (-5.36, 1.12) |
|            |            |           | No                 | No    | 1.00                |       |                     |
|            |            |           |                    | Yes   | 1.34 (0.86, 2.10)   | 0.34  |                     |
|            |            |           | Yes                | No    | 2.98 (1.19, 7.49)   |       |                     |
|            |            |           |                    | Yes   | 1.94 (0.81, 4.63)   | -1.04 | -1.38 (-4.43, 1.66) |
|            |            | rs4760658 | No                 | No    | 1.00                |       |                     |
|            |            |           |                    | Yes   | 0.83 (0.52, 1.32)   | -0.17 |                     |
|            |            |           | Yes                | No    | 1.30 (0.52, 3.25)   |       |                     |
|            |            |           |                    | Yes   | 2.79 (1.15, 6.77)   | 1.49  | 1.66 (-0.85, 4.16)  |
|            |            |           | No                 | No    | 1.00                |       |                     |
|            |            |           |                    | Yes   | 0.68 (0.42, 1.09)   | -0.32 |                     |
|            |            | rs4516035 | Yes                | No    | 1.04 (0.38, 2.81)   |       |                     |
|            |            |           |                    | Yes   | 2.21 (0.93, 5.26)   | 1.17  | 1.49 (-0.50, 3.48)  |
|            |            |           | No                 | No    | 1.00                |       |                     |
|            |            |           |                    | Yes   | 0.98 (0.64, 1.49)   | -0.02 |                     |
|            |            |           | Yes                | No    | 1.41 (0.63, 3.14)   |       |                     |
|            |            |           |                    | Yes   | 3.53 (1.32, 9.46)   | 2.12  | 2.14 (-1.18, 5.47)  |
|            |            | rs470724  | No                 | No    | 1.00                |       |                     |
|            |            |           |                    | Yes   | 1.05 (0.68, 1.64)   | 0.05  |                     |
|            |            |           | Yes                | No    | 1.56 (0.65, 3.75)   |       |                     |
|            |            |           |                    | Yes   | 2.86 (1.19, 6.85)   | 1.29  | 1.24 (-1.24, 3.72)  |
|            |            |           | No                 | No    | 1.00                |       |                     |
|            |            |           |                    | Yes   | 1.37 (0.82, 2.27)   | 0.37  |                     |
|            |            | rs470550  | Yes                | No    | 1.96 (0.66, 5.82)   |       |                     |
|            |            |           |                    | Yes   | 2.96 (1.28, 6.85)   | 1.00  | 0.63 (-2.06, 3.32)  |
|            |            |           | No                 | No    | 1.00                |       |                     |
|            |            |           |                    | Yes   | 0.78 (0.50, 1.22)   | -0.22 |                     |
|            |            |           | Yes                | No    | 3.24 (1.37, 7.68)   |       |                     |
|            |            |           |                    | Yes   | 1.01 (0.42, 2.42)   | -2.23 | -2.02 (-4.82, 0.78) |
| rs9676113  | No         | No        | 1.00               |       |                     |       |                     |
|            |            | Yes       | 0.78 (0.50, 1.22)  | -0.22 |                     |       |                     |
|            | Yes        | No        | 3.24 (1.37, 7.68)  |       |                     |       |                     |
|            |            | Yes       | 1.01 (0.42, 2.42)  | -2.23 | -2.02 (-4.82, 0.78) |       |                     |
|            | No         | No        | 1.00               |       |                     |       |                     |
|            |            | Yes       | 1.28 (0.80, 2.05)  | 0.28  |                     |       |                     |
| rs11661054 | Yes        | No        | 2.78 (0.94, 8.21)  |       |                     |       |                     |
|            |            | Yes       | 2.27 (1.01, 5.09)  | -0.51 | -0.79 (-3.97, 2.38) |       |                     |
|            | No         | No        | 1.00               |       |                     |       |                     |
|            |            | Yes       | 0.84 (0.53, 1.31)  | -0.16 |                     |       |                     |
|            | Yes        | No        | 3.97 (1.56, 10.06) |       |                     |       |                     |
|            |            | Yes       | 1.01 (0.42, 2.41)  | -2.96 | -2.80 (-6.49, 0.90) |       |                     |
| rs4890785  | No         | No        | 1.00               |       |                     |       |                     |
|            |            | Yes       | 0.84 (0.53, 1.31)  | -0.16 |                     |       |                     |
|            | Yes        | No        | 3.97 (1.56, 10.06) |       |                     |       |                     |
|            |            | Yes       | 1.01 (0.42, 2.41)  | -2.96 | -2.80 (-6.49, 0.90) |       |                     |
|            | No         | No        | 1.00               |       |                     |       |                     |
|            |            | Yes       | 1.27 (0.80, 2.00)  | 0.27  |                     |       |                     |
| rs11661755 | Yes        | No        | 2.68 (1.04, 6.87)  |       |                     |       |                     |
|            |            | Yes       | 2.14 (0.94, 4.89)  | -0.53 | -0.80 (-3.52, 1.92) |       |                     |
|            | No         | No        | 1.00               |       |                     |       |                     |
|            |            | Yes       | 1.27 (0.80, 2.00)  | 0.27  |                     |       |                     |
|            | Yes        | No        | 2.68 (1.04, 6.87)  |       |                     |       |                     |
|            |            | Yes       | 2.14 (0.94, 4.89)  | -0.53 | -0.80 (-3.52, 1.92) |       |                     |
| rs9675994  | No         | No        | 1.00               |       |                     |       |                     |
|            |            | Yes       | 1.27 (0.80, 2.00)  | 0.27  |                     |       |                     |

Supplemental Material, Table S1

| Chr. | Gene* | rs number  | Lead     |     | OR (95% CI)       | PD    | RERI (95% CI)       |
|------|-------|------------|----------|-----|-------------------|-------|---------------------|
|      |       |            | Exposure | SNP |                   |       |                     |
|      |       |            |          | Yes | 0.81 (0.51, 1.30) | -0.19 |                     |
|      |       |            | Yes      | No  | 1.63 (0.71, 3.73) |       |                     |
|      |       | rs8090438  |          | Yes | 2.19 (0.86, 5.58) | 0.56  | 0.75 (-1.49, 2.98)  |
|      |       |            | No       | No  | 1.00              |       |                     |
|      |       |            |          | Yes | 1.05 (0.66, 1.67) | 0.05  |                     |
|      |       |            | Yes      | No  | 2.50 (0.94, 6.64) |       |                     |
|      |       | rs8094402  |          | Yes | 1.91 (0.82, 4.44) | -0.59 | -0.64 (-3.25, 1.98) |
|      |       |            | No       | No  | 1.00              |       |                     |
|      |       |            |          | Yes | 1.36 (0.87, 2.13) | 0.36  |                     |
|      |       |            | Yes      | No  | 2.64 (1.11, 6.32) |       |                     |
|      |       | rs12456341 |          | Yes | 2.16 (0.92, 5.07) | -0.49 | -0.85 (-3.47, 1.78) |
|      |       |            | No       | No  | 1.00              |       |                     |
|      |       |            |          | Yes | 1.01 (0.64, 1.59) | 0.01  |                     |
|      |       |            | Yes      | No  | 2.20 (0.87, 5.54) |       |                     |
|      |       | rs17576751 |          | Yes | 2.22 (0.95, 5.15) | 0.02  | 0.01 (-2.26, 2.29)  |
|      |       |            | No       | No  | 1.00              |       |                     |
|      |       |            |          | Yes | 1.01 (0.63, 1.61) | 0.01  |                     |
|      |       |            | Yes      | No  | 2.77 (1.03, 7.41) |       |                     |
|      |       | rs3794848  |          | Yes | 1.68 (0.74, 3.80) | -1.09 | -1.10 (-3.93, 1.73) |
|      |       |            | No       | No  | 1.00              |       |                     |
|      |       |            |          | Yes | 1.11 (0.70, 1.75) | 0.11  |                     |
|      |       |            | Yes      | No  | 1.87 (0.80, 4.38) |       |                     |
|      |       | rs4890875  |          | Yes | 2.49 (1.03, 6.02) | 0.62  | 0.51 (-1.84, 2.87)  |
|      |       |            | No       | No  | 1.00              |       |                     |
|      |       |            |          | Yes | 0.98 (0.62, 1.55) | -0.02 |                     |
|      |       |            | Yes      | No  | 1.41 (0.58, 3.45) |       |                     |
|      |       | rs595997   |          | Yes | 2.62 (1.06, 6.48) | 1.22  | 1.23 (-1.12, 3.59)  |
|      |       |            | No       | No  | 1.00              |       |                     |
|      |       |            |          | Yes | 0.70 (0.44, 1.13) | -0.30 |                     |
|      |       |            | Yes      | No  | 2.96 (1.25, 7.00) |       |                     |
|      |       | rs2974260  |          | Yes | 0.90 (0.35, 2.29) | -2.06 | -1.76 (-4.36, 0.84) |
|      |       |            | No       | No  | 1.00              |       |                     |
|      |       |            |          | Yes | 1.64 (0.98, 2.75) | 0.64  |                     |
|      |       |            | Yes      | No  | 1.91 (0.73, 4.98) |       |                     |
|      |       | rs2051344  |          | Yes | 3.78 (1.56, 9.17) | 1.87  | 1.23 (-2.01, 4.48)  |
|      |       |            | No       | No  | 1.00              |       |                     |
|      |       |            |          | Yes | 0.83 (0.53, 1.29) | -0.17 |                     |
|      |       |            | Yes      | No  | 1.57 (0.68, 3.66) |       |                     |
|      |       | rs470681   |          | Yes | 2.16 (0.90, 5.19) | 0.58  | 0.76 (-1.23, 2.74)  |
|      |       |            | No       | No  | 1.00              |       |                     |
|      |       |            |          | Yes | 0.86 (0.54, 1.35) | -0.14 |                     |
|      |       |            | Yes      | No  | 3.67 (1.49, 9.03) |       |                     |
|      |       |            |          | Yes | 0.90 (0.36, 2.24) | -2.77 | -2.63 (-5.96, 0.71) |

Supplemental Material, Table S1

| Chr.   | Gene*       | rs number          | Lead              |                     | OR (95% CI)        | PD    | RERI (95% CI)       |
|--------|-------------|--------------------|-------------------|---------------------|--------------------|-------|---------------------|
|        |             |                    | Exposure          | SNP                 |                    |       |                     |
| 19     | <i>APOE</i> | rs12967023         | No                | No                  | 1.00               |       |                     |
|        |             |                    |                   | Yes                 | 1.45 (0.90, 2.34)  | 0.45  |                     |
|        |             | rs4890788          | Yes               | No                  | 1.64 (0.67, 3.98)  |       |                     |
|        |             |                    |                   | Yes                 | 3.75 (1.55, 9.06)  | 2.11  | 1.66 (-1.56, 4.87)  |
|        |             |                    | No                | No                  | 1.00               |       |                     |
|        |             |                    |                   | Yes                 | 1.07 (0.67, 1.70)  | 0.07  |                     |
|        |             | rs7232502          | Yes               | No                  | 2.26 (0.88, 5.79)  |       |                     |
|        |             |                    |                   | Yes                 | 2.17 (0.93, 5.09)  | -0.09 | -0.16 (-2.58, 2.26) |
|        |             |                    | No                | No                  | 1.00               |       |                     |
|        |             |                    |                   | Yes                 | 0.97 (0.60, 1.56)  | -0.03 |                     |
|        |             | rs8096433          | Yes               | No                  | 2.23 (0.79, 6.28)  |       |                     |
|        |             |                    |                   | Yes                 | 1.87 (0.85, 4.12)  | -0.36 | -0.33 (-2.77, 2.11) |
|        |             |                    | No                | No                  | 1.00               |       |                     |
|        |             |                    |                   | Yes                 | 1.84 (1.07, 3.15)  | 0.84  |                     |
|        |             | rs17660901         | Yes               | No                  | 3.05 (0.79, 11.73) |       |                     |
|        |             |                    |                   | Yes                 | 2.96 (1.35, 6.47)  | -0.09 | -0.93 (-5.18, 3.33) |
|        |             |                    | No                | No                  | 1.00               |       |                     |
|        |             |                    |                   | Yes                 | 0.82 (0.52, 1.29)  | -0.18 |                     |
|        |             | rs429358           | Yes               | No                  | 1.97 (0.87, 4.50)  |       |                     |
|        |             |                    |                   | Yes                 | 1.60 (0.65, 3.93)  | -0.37 | -0.20 (-2.06, 1.66) |
| No     | No          |                    | 1.00              |                     |                    |       |                     |
|        | Yes         |                    | 0.91 (0.55, 1.52) | -0.09               |                    |       |                     |
| rs7412 | Yes         | No                 | 1.83 (0.88, 3.82) |                     |                    |       |                     |
|        |             | Yes                | 2.14 (0.76, 6.07) | 0.31                | 0.40 (-1.98, 2.77) |       |                     |
|        | No          | No                 | 1.00              |                     |                    |       |                     |
|        |             | Yes                | 0.99 (0.53, 1.86) | -0.01               |                    |       |                     |
| Yes    | No          | 1.44 (0.70, 2.97)  |                   |                     |                    |       |                     |
|        | Yes         | 7.45 (1.78, 31.20) | 6.01              | 6.02 (-4.56, 16.59) |                    |       |                     |

Abbreviations: *APOE*, Apolipoprotein E; CI=confidence interval; *HLA*, Human leukocyte antigen; *IL2RA*, Interleukin-2 receptor alpha; *IL7RA*, Interleukin-7 receptor alpha; MAF, minor allele frequency; *MBP*, Myelin basic protein; OR, prevalence odds ratio; PD, prevalence difference; SNP, single nucleotide polymorphism; *TCA-β*, T cell antigen receptor beta; *TNFα*, Tumor necrosis factor alpha; *TNFβ*, Tumor necrosis factor beta; *VDR*, Vitamin D receptor.
