# Supplementary material
Source: PubMed Central journal article supplement (PMC4334728)
Supplement: NIHMS655955-supplement-Supplemental_Table_2.pdf [file NIHMS655955-supplement-Supplemental_Table_2.pdf]

Supplemental Material, Table S2

Supplemental Material, Table S2. Stratum-specific estimates (OR, 95% CI) and relative excess risk due to interaction (RERI, 95% CI) for each SNP-mercury association using single-referent coding, adjusting for education and ancestry

| Chr.                 | Gene*                         | rs number         | Mercury Exposure   | SNP                | OR (95% CI)         | PD                  | RERI (95% CI)        |
|----------------------|-------------------------------|-------------------|--------------------|--------------------|---------------------|---------------------|----------------------|
| 5                    | <i>IL7R</i>                   | rs6897932         | No                 | No                 | 1.00                |                     |                      |
|                      |                               |                   |                    | Yes                | 0.95 (0.64, 1.40)   | -0.05               |                      |
|                      |                               |                   | Yes                | No                 | 1.86 (0.80, 4.31)   |                     |                      |
| 6                    | <i>TNF<math>\alpha</math></i> | rs1799964         | No                 | No                 | 1.00                |                     |                      |
|                      |                               |                   |                    | Yes                | 2.21 (0.86, 5.65)   | 0.35                | 0.40 (-2.10, 2.91)   |
|                      |                               |                   | Yes                | No                 | 2.40 (1.12, 5.13)   |                     |                      |
|                      |                               | rs1800629         | No                 | No                 | 1.00                |                     |                      |
|                      |                               |                   |                    | Yes                | 0.89 (0.55, 1.42)   | -0.11               |                      |
|                      |                               |                   | Yes                | No                 | 1.90 (0.91, 3.93)   |                     |                      |
|                      | <i>TNF<math>\beta</math></i>  | rs3093671         | No                 | No                 | 1.00                |                     |                      |
|                      |                               |                   |                    | Yes                | 2.37 (0.73, 7.68)   | 0.48                | 0.59 (-2.38, 3.57)   |
|                      |                               |                   | Yes                | No                 | 2.14 (1.11, 4.12)   |                     |                      |
|                      |                               | rs769178          | No                 | No                 | 1.00                |                     |                      |
|                      |                               |                   |                    | Yes                | 0.00 (0.00, 0.00)   | -2.14               | -2.08 (-4.11, -0.05) |
|                      |                               |                   | Yes                | No                 | 1.86 (0.89, 3.90)   |                     |                      |
|                      |                               | rs769177          | No                 | No                 | 1.00                |                     |                      |
|                      |                               |                   |                    | Yes                | 2.01 (0.64, 6.36)   | 0.15                | 0.43 (-2.09, 2.95)   |
|                      |                               |                   |                    | Yes                | 0.69 (0.24, 1.96)   | -0.31               |                      |
|                      | Yes                           |                   | 2.00 (1.04, 3.81)  |                    |                     |                     |                      |
|                      | Yes                           |                   | 0.74 (0.46, 1.18)  | -1.25              | -0.68 (0.00, 0.00)  |                     |                      |
|                      | Yes                           |                   | 0.74 (0.46, 1.18)  |                    |                     |                     |                      |
| <i>HLA-DRB1*1501</i> | rs3135388                     | No                | No                 | 1.00               |                     |                     |                      |
|                      |                               |                   | Yes                | 2.51 (1.02, 6.18)  | 1.46                | 1.84 (-0.52, 4.19)  |                      |
|                      |                               | Yes               | No                 | 3.69 (2.31, 5.88)  | 2.69                |                     |                      |
|                      | rs9471958                     | No                | No                 | 1.00               |                     |                     |                      |
|                      |                               |                   | Yes                | 5.03 (1.85, 13.67) | 2.53                | -0.16 (-5.48, 5.16) |                      |
|                      |                               | Yes               | No                 | 2.50 (1.03, 6.06)  |                     |                     |                      |
| <i>PTCRA</i>         | rs9471958                     | No                | No                 | 1.00               |                     |                     |                      |
|                      |                               |                   | Yes                | 1.08 (0.73, 1.62)  | 0.08                |                     |                      |
|                      |                               | Yes               | No                 | 2.30 (0.92, 5.78)  |                     |                     |                      |
|                      | rs6901007                     | No                | No                 | 1.00               |                     |                     |                      |
|                      |                               |                   | Yes                | 2.01 (0.80, 5.03)  | -0.29               | -0.37 (-3.10, 2.35) |                      |
|                      |                               | Yes               | No                 | 2.01 (0.80, 5.03)  |                     |                     |                      |
|                      | Yes                           | 1.00 (0.66, 1.53) | 0.00               |                    |                     |                     |                      |
|                      | Yes                           | No                | 3.19 (0.88, 11.64) |                    |                     |                     |                      |
|                      | Yes                           | Yes               | 1.76 (0.79, 3.94)  | -1.43              | -1.43 (-5.71, 2.85) |                     |                      |

Supplemental Material, Table S2

| Chr.      | Gene*        | rs number         | Mercury Exposure  | SNP                | OR (95% CI)       | PD                 | RERI (95% CI)       |                     |  |
|-----------|--------------|-------------------|-------------------|--------------------|-------------------|--------------------|---------------------|---------------------|--|
| 7         | <i>TCA-β</i> | rs17133575        | No                | No                 | 1.00              |                    |                     |                     |  |
|           |              |                   |                   | Yes                | 0.96 (0.61, 1.51) | -0.04              |                     |                     |  |
|           |              |                   | Yes               | No                 | 1.44 (0.64, 3.28) |                    |                     |                     |  |
|           |              |                   |                   | Yes                | 3.27 (1.13, 9.46) | 1.83               | 1.87 (-1.67, 5.42)  |                     |  |
|           |              |                   | rs17243           | No                 | No                | 1.00               |                     |                     |  |
|           |              |                   |                   | Yes                | No                | 1.47 (0.42, 5.20)  | -0.13               |                     |  |
| 10        | <i>IL2RA</i> | rs2104286         | No                | No                 | 1.00              |                    |                     |                     |  |
|           |              |                   |                   | Yes                | 0.97 (0.64, 1.46) | -0.03              |                     |                     |  |
|           |              |                   | Yes               | No                 | 1.95 (0.81, 4.70) |                    |                     |                     |  |
|           |              |                   |                   | Yes                | 2.34 (0.85, 6.40) | 0.39               | 0.42 (-2.43, 3.28)  |                     |  |
|           |              |                   | rs2248098         | No                 | No                | 1.00               |                     |                     |  |
|           |              |                   |                   | Yes                | No                | 2.65 (0.54, 12.95) | 0.22                |                     |  |
| 12        | <i>VDR</i>   | rs7975128         | No                | No                 | 1.00              |                    |                     |                     |  |
|           |              |                   |                   | Yes                | 1.00 (0.65, 1.54) | 0.00               |                     |                     |  |
|           |              |                   | Yes               | No                 | 2.55 (0.81, 8.05) |                    |                     |                     |  |
|           |              |                   |                   | Yes                | 1.92 (0.87, 4.24) | -0.64              | -0.64 (-3.77, 2.49) |                     |  |
|           |              |                   | rs2248098         | No                 | No                | 1.00               |                     |                     |  |
|           |              |                   |                   |                    | Yes               | 1.22 (0.75, 1.97)  | 0.22                |                     |  |
|           |              |                   |                   | Yes                | No                | 2.65 (0.54, 12.95) |                     |                     |  |
|           |              |                   |                   |                    | Yes               | 2.89 (1.24, 6.73)  | 0.24                | 0.02 (-4.51, 4.55)  |  |
|           |              |                   |                   | rs2239182          | No                | No                 | 1.00                |                     |  |
|           |              |                   |                   |                    | Yes               | No                 | 1.27 (0.78, 2.06)   | 0.27                |  |
|           |              |                   |                   | Yes                | No                | 1.67 (0.41, 6.83)  |                     |                     |  |
|           |              |                   |                   | Yes                | 2.77 (1.24, 6.21) | 1.10               | 0.83 (-2.13, 3.79)  |                     |  |
|           |              |                   | rs2107301         | No                 | No                | 1.00               |                     |                     |  |
|           |              |                   |                   |                    | Yes               | 1.10 (0.73, 1.67)  | 0.10                |                     |  |
|           |              |                   |                   | Yes                | No                | 1.35 (0.54, 3.38)  |                     |                     |  |
|           |              |                   |                   |                    | Yes               | 3.21 (1.37, 7.54)  | 1.87                | 1.77 (-1.05, 4.58)  |  |
|           |              |                   |                   | rs1540339          | No                | No                 | 1.00                |                     |  |
|           |              |                   |                   |                    | Yes               | No                 | 1.06 (0.70, 1.62)   | 0.06                |  |
|           |              |                   |                   | Yes                | No                | 0.94 (0.32, 2.77)  |                     |                     |  |
|           |              |                   |                   | Yes                | 3.46 (1.47, 8.17) | 2.52               | 2.46 (-0.47, 5.38)  |                     |  |
|           |              |                   | rs2239179         | No                 | No                | 1.00               |                     |                     |  |
|           |              |                   |                   |                    | Yes               | 0.98 (0.64, 1.51)  | -0.02               |                     |  |
|           |              |                   |                   | Yes                | No                | 2.25 (0.85, 5.96)  |                     |                     |  |
|           |              |                   |                   |                    | Yes               | 1.87 (0.81, 4.29)  | -0.38               | -0.37 (-2.85, 2.11) |  |
| rs2189480 | No           | No                |                   | 1.00               |                   |                    |                     |                     |  |
|           | Yes          | No                |                   | 1.12 (0.72, 1.74)  | 0.12              |                    |                     |                     |  |
|           | Yes          | No                | 0.78 (0.23, 2.66) |                    |                   |                    |                     |                     |  |
|           | Yes          | 3.98 (1.73, 9.17) | 3.20              | 3.08 (-0.14, 6.29) |                   |                    |                     |                     |  |
| rs3819545 | No           | No                | 1.00              |                    |                   |                    |                     |                     |  |
|           |              | Yes               | 0.98 (0.64, 1.49) | -0.02              |                   |                    |                     |                     |  |
|           | Yes          | No                | 1.52 (0.45, 5.12) |                    |                   |                    |                     |                     |  |

Supplemental Material, Table S2

| Chr. | Gene* | rs number  | Mercury Exposure | SNP | OR (95% CI)        | PD    | RERI (95% CI)       |
|------|-------|------------|------------------|-----|--------------------|-------|---------------------|
|      |       |            |                  | Yes | 2.20 (1.00, 4.85)  | 0.68  | 0.70 (-1.60, 3.01)  |
|      |       | rs3782905  | No               | No  | 1.00               |       |                     |
|      |       |            |                  | Yes | 0.92 (0.61, 1.38)  | -0.08 |                     |
|      |       |            | Yes              | No  | 2.42 (1.00, 5.87)  |       |                     |
|      |       |            |                  | Yes | 1.59 (0.61, 4.12)  | -0.84 | -0.75 (-3.29, 1.79) |
|      |       | rs2239186  | No               | No  | 1.00               |       |                     |
|      |       |            |                  | Yes | 0.85 (0.54, 1.34)  | -0.15 |                     |
|      |       |            | Yes              | No  | 1.05 (0.44, 2.49)  |       |                     |
|      |       |            |                  | Yes | 4.27 (1.63, 11.17) | 3.22  | 3.37 (-0.72, 7.45)  |
|      |       | rs2228570  | No               | No  | 1.00               |       |                     |
|      |       |            |                  | Yes | 0.89 (0.58, 1.37)  | -0.11 |                     |
|      |       |            | Yes              | No  | 1.16 (0.35, 3.78)  |       |                     |
|      |       |            |                  | Yes | 2.40 (1.05, 5.46)  | 1.24  | 1.35 (-0.92, 3.62)  |
|      |       | rs2254210  | No               | No  | 1.00               |       |                     |
|      |       |            |                  | Yes | 0.88 (0.57, 1.37)  | -0.12 |                     |
|      |       |            | Yes              | No  | 1.66 (0.55, 5.04)  |       |                     |
|      |       |            |                  | Yes | 2.29 (1.06, 4.98)  | 0.63  | 0.75 (-1.65, 3.15)  |
|      |       | rs2238136  | No               | No  | 1.00               |       |                     |
|      |       |            |                  | Yes | 1.16 (0.75, 1.77)  | 0.16  |                     |
|      |       |            | Yes              | No  | 2.05 (0.82, 5.14)  |       |                     |
|      |       |            |                  | Yes | 2.22 (0.88, 5.57)  | 0.16  | 0.01 (-2.67, 2.69)  |
|      |       | rs2853564  | No               | No  | 1.00               |       |                     |
|      |       |            |                  | Yes | 1.09 (0.70, 1.70)  | 0.09  |                     |
|      |       |            | Yes              | No  | 1.69 (0.54, 5.33)  |       |                     |
|      |       |            |                  | Yes | 2.60 (1.16, 5.81)  | 0.90  | 0.82 (-1.88, 3.51)  |
|      |       | rs4760648  | No               | No  | 1.00               |       |                     |
|      |       |            |                  | Yes | 1.03 (0.66, 1.61)  | 0.03  |                     |
|      |       |            | Yes              | No  | 2.13 (0.78, 5.83)  |       |                     |
|      |       |            |                  | Yes | 1.89 (0.74, 4.83)  | -0.25 | -0.27 (-2.84, 2.29) |
|      |       | rs11168287 | No               | No  | 1.00               |       |                     |
|      |       |            |                  | Yes | 1.18 (0.74, 1.90)  | 0.18  |                     |
|      |       |            | Yes              | No  | 2.52 (0.72, 8.80)  |       |                     |
|      |       |            |                  | Yes | 2.36 (1.03, 5.40)  | -0.17 | -0.35 (-3.84, 3.14) |
|      |       | rs4328262  | No               | No  | 1.00               |       |                     |
|      |       |            |                  | Yes | 1.37 (0.88, 2.13)  | 0.37  |                     |
|      |       |            | Yes              | No  | 3.68 (1.14, 11.88) |       |                     |
|      |       |            |                  | Yes | 2.22 (0.96, 5.10)  | -1.46 | -1.83 (-6.37, 2.71) |
|      |       | rs4237855  | No               | No  | 1.00               |       |                     |
|      |       |            |                  | Yes | 0.82 (0.53, 1.26)  | -0.18 |                     |
|      |       |            | Yes              | No  | 1.49 (0.51, 4.33)  |       |                     |
|      |       |            |                  | Yes | 2.48 (1.05, 5.90)  | 0.99  | 1.17 (-1.29, 3.63)  |
|      |       | rs7136534  | No               | No  | 1.00               |       |                     |
|      |       |            |                  | Yes | 1.41 (0.93, 2.14)  | 0.41  |                     |

Supplemental Material, Table S2

| Chr.       | Gene*      | rs number  | Mercury Exposure   | SNP   | OR (95% CI)         | PD    | RERI (95% CI)        |  |
|------------|------------|------------|--------------------|-------|---------------------|-------|----------------------|--|
| 18         | <i>MBP</i> | rs7299460  | Yes                | No    | 3.06 (1.31, 7.16)   |       |                      |  |
|            |            |            | No                 | Yes   | 2.22 (0.83, 5.90)   | -0.84 | -1.26 (-4.46, 1.95)  |  |
|            |            | rs4760658  | No                 | No    | 1.00                |       |                      |  |
|            |            |            | Yes                | Yes   | 1.40 (0.93, 2.11)   | 0.40  |                      |  |
|            |            | rs4516035  | Yes                | No    | 2.41 (1.02, 5.69)   |       |                      |  |
|            |            |            | Yes                | Yes   | 2.68 (1.03, 7.00)   | 0.27  | -0.13 (-3.19, 2.93)  |  |
|            |            | rs17026    | No                 | No    | 1.00                |       |                      |  |
|            |            |            | Yes                | Yes   | 0.99 (0.65, 1.51)   | -0.01 |                      |  |
|            |            | rs470724   | Yes                | No    | 1.29 (0.47, 3.52)   |       |                      |  |
|            |            |            | Yes                | Yes   | 2.83 (1.20, 6.69)   | 1.54  | 1.55 (-1.08, 4.18)   |  |
|            |            | rs470550   | No                 | No    | 1.00                |       |                      |  |
|            |            |            | Yes                | Yes   | 0.83 (0.53, 1.30)   | -0.17 |                      |  |
|            |            | rs9676113  | Yes                | No    | 1.16 (0.38, 3.53)   |       |                      |  |
|            |            |            | Yes                | Yes   | 2.33 (1.02, 5.33)   | 1.17  | 1.34 (-0.84, 3.53)   |  |
|            |            | rs11661054 | No                 | No    | 1.00                |       |                      |  |
|            |            |            | Yes                | Yes   | 1.14 (0.76, 1.69)   | 0.14  |                      |  |
|            |            | rs4890785  | Yes                | No    | 1.78 (0.80, 3.95)   |       |                      |  |
|            |            |            | Yes                | Yes   | 3.10 (1.01, 9.54)   | 1.33  | 1.19 (-2.40, 4.78)   |  |
|            |            | rs11661755 | No                 | No    | 1.00                |       |                      |  |
|            |            |            | Yes                | Yes   | 1.14 (0.76, 1.73)   | 0.14  |                      |  |
|            |            | rs9675994  | Yes                | No    | 1.63 (0.66, 4.02)   |       |                      |  |
|            |            |            | Yes                | Yes   | 3.15 (1.22, 8.13)   | 1.52  | 1.37 (-1.78, 4.53)   |  |
|            |            | rs4890785  | No                 | No    | 1.00                |       |                      |  |
|            |            |            | Yes                | Yes   | 1.55 (0.96, 2.51)   | 0.55  |                      |  |
|            |            | rs11661054 | Yes                | No    | 8.65 (1.88, 39.70)  |       |                      |  |
|            |            |            | Yes                | Yes   | 2.24 (0.99, 5.10)   | -6.41 | -6.96 (-20.15, 6.24) |  |
|            |            | rs4890785  | No                 | No    | 1.00                |       |                      |  |
|            |            |            | Yes                | Yes   | 0.66 (0.44, 0.99)   | -0.34 |                      |  |
|            |            | rs11661755 | Yes                | No    | 2.64 (1.07, 6.51)   |       |                      |  |
|            |            |            | Yes                | Yes   | 1.13 (0.44, 2.87)   | -1.51 | -1.17 (-3.74, 1.40)  |  |
|            |            | rs4890785  | No                 | No    | 1.00                |       |                      |  |
|            |            |            | Yes                | Yes   | 1.37 (0.88, 2.13)   | 0.37  |                      |  |
| rs11661755 | Yes        | No         | 4.43 (1.46, 13.42) |       |                     |       |                      |  |
|            | Yes        | Yes        | 2.03 (0.88, 4.69)  | -2.39 | -2.76 (-7.74, 2.22) |       |                      |  |
| rs9675994  | No         | No         | 1.00               |       |                     |       |                      |  |
|            | Yes        | Yes        | 0.70 (0.46, 1.05)  | -0.30 |                     |       |                      |  |
| rs9675994  | Yes        | No         | 2.54 (1.02, 6.31)  |       |                     |       |                      |  |
|            | Yes        | Yes        | 1.28 (0.50, 3.29)  | -1.26 | -0.96 (-3.53, 1.61) |       |                      |  |
| rs9675994  | No         | No         | 1.00               |       |                     |       |                      |  |
|            | Yes        | Yes        | 1.39 (0.91, 2.13)  | 0.39  |                     |       |                      |  |
| rs9675994  | Yes        | No         | 4.60 (1.41, 14.98) |       |                     |       |                      |  |
|            | Yes        | Yes        | 1.96 (0.85, 4.53)  | -2.63 | -3.02 (-8.61, 2.56) |       |                      |  |
| rs9675994  | No         | No         | 1.00               |       |                     |       |                      |  |

Supplemental Material, Table S2

| Chr. | Gene* | rs number  | Mercury Exposure | SNP | OR (95% CI)        | PD    | RERI (95% CI)       |
|------|-------|------------|------------------|-----|--------------------|-------|---------------------|
|      |       |            |                  | Yes | 0.89 (0.57, 1.37)  | -0.11 |                     |
|      |       |            | Yes              | No  | 3.78 (1.48, 9.66)  |       |                     |
|      |       | rs8090438  |                  | Yes | 1.07 (0.43, 2.62)  | -2.71 | -2.60 (-6.23, 1.03) |
|      |       |            | No               | No  | 1.00               |       |                     |
|      |       |            |                  | Yes | 1.20 (0.77, 1.85)  | 0.20  |                     |
|      |       |            | Yes              | No  | 3.79 (1.12, 12.85) |       |                     |
|      |       | rs8094402  |                  | Yes | 2.03 (0.88, 4.65)  | -1.77 | -1.96 (-6.75, 2.83) |
|      |       |            | No               | No  | 1.00               |       |                     |
|      |       |            |                  | Yes | 1.48 (0.97, 2.25)  | 0.48  |                     |
|      |       |            | Yes              | No  | 2.60 (0.97, 6.98)  |       |                     |
|      |       | rs12456341 |                  | Yes | 2.55 (1.06, 6.15)  | -0.04 | -0.52 (-3.81, 2.76) |
|      |       |            | No               | No  | 1.00               |       |                     |
|      |       |            |                  | Yes | 1.21 (0.79, 1.85)  | 0.21  |                     |
|      |       |            | Yes              | No  | 3.49 (1.25, 9.73)  |       |                     |
|      |       | rs17576751 |                  | Yes | 1.65 (0.69, 3.97)  | -1.83 | -2.04 (-5.72, 1.64) |
|      |       |            | No               | No  | 1.00               |       |                     |
|      |       |            |                  | Yes | 1.18 (0.76, 1.84)  | 0.18  |                     |
|      |       |            | Yes              | No  | 1.75 (0.67, 4.54)  |       |                     |
|      |       | rs3794848  |                  | Yes | 2.98 (1.17, 7.62)  | 1.24  | 1.06 (-1.99, 4.11)  |
|      |       |            | No               | No  | 1.00               |       |                     |
|      |       |            |                  | Yes | 1.30 (0.86, 1.97)  | 0.30  |                     |
|      |       |            | Yes              | No  | 2.35 (0.84, 6.59)  |       |                     |
|      |       | rs4890875  |                  | Yes | 2.39 (1.05, 5.42)  | 0.04  | -0.26 (-3.19, 2.66) |
|      |       |            | No               | No  | 1.00               |       |                     |
|      |       |            |                  | Yes | 1.18 (0.79, 1.78)  | 0.18  |                     |
|      |       |            | Yes              | No  | 3.75 (1.39, 10.16) |       |                     |
|      |       | rs595997   |                  | Yes | 1.75 (0.75, 4.10)  | -2.00 | -2.19 (-6.08, 1.70) |
|      |       |            | No               | No  | 1.00               |       |                     |
|      |       |            |                  | Yes | 0.59 (0.38, 0.91)  | -0.41 |                     |
|      |       |            | Yes              | No  | 1.70 (0.72, 4.02)  |       |                     |
|      |       | rs2974260  |                  | Yes | 1.49 (0.56, 3.98)  | -0.22 | 0.19 (-1.81, 2.19)  |
|      |       |            | No               | No  | 1.00               |       |                     |
|      |       |            |                  | Yes | 1.99 (1.24, 3.20)  | 0.99  |                     |
|      |       |            | Yes              | No  | 3.40 (0.95, 12.20) |       |                     |
|      |       | rs2051344  |                  | Yes | 3.23 (1.43, 7.30)  | -0.17 | -1.16 (-6.05, 3.73) |
|      |       |            | No               | No  | 1.00               |       |                     |
|      |       |            |                  | Yes | 0.89 (0.60, 1.32)  | -0.11 |                     |
|      |       |            | Yes              | No  | 1.78 (0.68, 4.67)  |       |                     |
|      |       | rs470681   |                  | Yes | 2.03 (0.88, 4.68)  | 0.25  | 0.36 (-1.86, 2.59)  |
|      |       |            | No               | No  | 1.00               |       |                     |
|      |       |            |                  | Yes | 0.68 (0.44, 1.03)  | -0.32 |                     |
|      |       |            | Yes              | No  | 1.63 (0.68, 3.89)  |       |                     |
|      |       |            |                  | Yes | 1.93 (0.76, 4.89)  | 0.30  | 0.62 (-1.52, 2.76)  |

Supplemental Material, Table S2

| Chr.     | Gene*       | rs number  | Mercury Exposure   | SNP   | OR (95% CI)        | PD    | RERI (95% CI)        |
|----------|-------------|------------|--------------------|-------|--------------------|-------|----------------------|
| 19       | <i>APOE</i> | rs12967023 | No                 | No    | 1.00               |       |                      |
|          |             |            | Yes                | No    | 1.84 (1.19, 2.85)  | 0.84  |                      |
|          |             |            | Yes                | Yes   | 2.58 (1.08, 6.17)  |       |                      |
|          |             |            | Yes                | No    | 3.23 (1.23, 8.53)  | 0.65  | -0.19 (-3.86, 3.48)  |
|          |             |            | Yes                | Yes   | 1.09 (0.71, 1.66)  | 0.09  |                      |
|          |             |            | Yes                | No    | 2.30 (0.83, 6.40)  |       |                      |
|          |             | rs4890788  | No                 | No    | 1.00               |       |                      |
|          |             |            | Yes                | No    | 2.01 (0.87, 4.69)  | -0.29 | -0.37 (-3.10, 2.35)  |
|          |             |            | Yes                | Yes   | 1.05 (0.68, 1.62)  | 0.05  |                      |
|          |             |            | Yes                | No    | 1.87 (0.70, 5.00)  |       |                      |
|          |             |            | Yes                | Yes   | 2.32 (1.00, 5.39)  | 0.45  | 0.40 (-2.03, 2.84)   |
|          |             |            | Yes                | No    | 1.93 (1.19, 3.12)  | 0.93  |                      |
|          |             | rs8096433  | No                 | No    | 1.00               |       |                      |
|          |             |            | Yes                | No    | 8.44 (2.31, 30.90) |       |                      |
|          |             |            | Yes                | Yes   | 2.21 (0.97, 5.04)  | -6.23 | -7.16 (-18.20, 3.88) |
|          |             |            | Yes                | No    | 0.81 (0.54, 1.21)  | -0.19 |                      |
|          |             |            | Yes                | Yes   | 1.77 (0.77, 4.10)  | -0.06 | 0.13 (-2.02, 2.28)   |
|          |             |            | Yes                | No    | 1.57 (0.76, 3.28)  |       |                      |
|          |             | rs17660901 | No                 | No    | 1.00               |       |                      |
|          |             |            | Yes                | No    | 4.28 (1.25, 14.66) | 2.70  | 2.80 (-2.51, 8.11)   |
|          |             |            | Yes                | Yes   | 0.90 (0.56, 1.44)  | -0.10 |                      |
|          |             |            | Yes                | No    | 1.57 (0.76, 3.28)  |       |                      |
|          |             |            | Yes                | Yes   | 4.28 (1.25, 14.66) | 2.70  | 2.80 (-2.51, 8.11)   |
|          |             |            | Yes                | No    | 1.57 (0.76, 3.28)  |       |                      |
| rs429358 | No          | No         | 1.00               |       |                    |       |                      |
|          | Yes         | No         | 1.57 (0.76, 3.28)  |       |                    |       |                      |
|          | Yes         | Yes        | 4.28 (1.25, 14.66) | 2.70  | 2.80 (-2.51, 8.11) |       |                      |
|          | Yes         | No         | 0.94 (0.53, 1.65)  | -0.06 |                    |       |                      |
|          | Yes         | Yes        | 1.86 (0.90, 3.84)  |       |                    |       |                      |
|          | Yes         | No         | 1.86 (0.90, 3.84)  |       |                    |       |                      |
| rs7412   | No          | No         | 1.00               |       |                    |       |                      |
|          | Yes         | No         | 1.86 (0.90, 3.84)  |       |                    |       |                      |
|          | Yes         | Yes        | 2.81 (0.74, 10.64) | 0.95  | 1.02 (-2.94, 4.97) |       |                      |
|          | Yes         | No         | 1.86 (0.90, 3.84)  |       |                    |       |                      |
|          | Yes         | Yes        | 2.81 (0.74, 10.64) | 0.95  | 1.02 (-2.94, 4.97) |       |                      |
|          | Yes         | No         | 1.86 (0.90, 3.84)  |       |                    |       |                      |

Abbreviations: *APOE*, Apolipoprotein E; CI=confidence interval; *HLA*, Human leukocyte antigen; *IL2RA*, Interleukin-2 receptor alpha; *IL7RA*, Interleukin-7 receptor alpha; MAF, minor allele frequency; *MBP*, Myelin basic protein; OR, prevalence odds ratio; PD, prevalence difference; SNP, single nucleotide polymorphism; *TCA-β*, T cell antigen receptor beta; *TNFα*, Tumor necrosis factor alpha; *TNFβ*, Tumor necrosis factor beta; *VDR*, Vitamin D receptor.
