# Supplementary material
Source: PubMed Central journal article supplement (PMC4334728)
Supplement: NIHMS655955-supplement-Supplemental_Table_3.pdf [file NIHMS655955-supplement-Supplemental_Table_3.pdf]

Supplemental Material, Table S3

Supplemental Material, Table S3. Stratum-specific estimates (OR, 95% CI) and relative excess risk due to interaction (RERI, 95% CI) for each SNP-solvent association using single-referent coding, adjusting for education and ancestry

| Chr.                 | Gene*                         | rs number | Solvent Exposure | SNP               | OR (95% CI)       | PD                  | RERI (95% CI)       |
|----------------------|-------------------------------|-----------|------------------|-------------------|-------------------|---------------------|---------------------|
| 5                    | <i>IL7R</i>                   | rs6897932 | No               | No                | 1.00              |                     |                     |
|                      |                               |           | Yes              | No                | 0.87 (0.60, 1.26) | -0.13               |                     |
|                      |                               |           | Yes              | Yes               | 0.75 (0.28, 2.01) |                     |                     |
| 6                    | <i>TNF<math>\alpha</math></i> | rs1799964 | No               | No                | 1.00              |                     |                     |
|                      |                               |           | Yes              | No                | 0.36 (0.07, 1.80) | -0.39               | -0.26 (-1.25, 0.73) |
|                      |                               |           | Yes              | Yes               | 0.86 (0.23, 3.30) | 0.28                | 0.22 (-1.09, 1.53)  |
|                      |                               | rs1800629 | No               | No                | 1.00              |                     |                     |
|                      |                               |           | Yes              | No                | 0.82 (0.53, 1.26) | -0.18               |                     |
|                      |                               |           | Yes              | Yes               | 0.64 (0.25, 1.60) |                     |                     |
|                      | <i>TNF<math>\beta</math></i>  | rs3093671 | No               | No                | 1.00              |                     |                     |
|                      |                               |           | Yes              | No                | 0.45 (0.12, 1.66) | -0.55               |                     |
|                      |                               |           | Yes              | Yes               | 0.91 (0.57, 1.46) | 0.30                | 0.94 (0.00, 0.00)   |
|                      |                               | rs769178  | No               | No                | 1.00              |                     |                     |
|                      |                               |           | Yes              | No                | 0.52 (0.28, 0.96) | -0.48               |                     |
|                      |                               |           | Yes              | Yes               | 1.05 (0.16, 7.08) | 0.52                | 1.00 (-1.09, 3.09)  |
|                      | rs769177                      | No        | No               | 1.00              |                   |                     |                     |
|                      |                               | Yes       | No               | 0.40 (0.13, 1.24) | -0.60             |                     |                     |
|                      |                               | Yes       | Yes              | 0.83 (0.52, 1.31) | 0.19              | 0.95 (0.00, 0.00)   |                     |
| rs909253             |                               | No        | No               | 1.00              |                   |                     |                     |
|                      |                               | Yes       | No               | 0.66 (0.45, 0.98) | -0.34             |                     |                     |
|                      |                               | Yes       | Yes              | 0.84 (0.26, 2.75) | 0.47              | 0.80 (-0.28, 1.88)  |                     |
| <i>HLA-DRB1*1501</i> | rs3135388                     | No        | No               | 1.00              |                   |                     |                     |
|                      |                               | Yes       | No               | 3.28 (2.16, 4.99) | 2.28              |                     |                     |
|                      |                               | Yes       | Yes              | 0.36 (0.07, 1.74) |                   |                     |                     |
| <i>PTCRA</i>         | rs9471958                     | No        | No               | 1.00              |                   |                     |                     |
|                      |                               | Yes       | No               | 1.09 (0.75, 1.59) | 0.09              |                     |                     |
|                      |                               | Yes       | Yes              | 1.25 (0.45, 3.47) |                   |                     |                     |
|                      | rs6901007                     | No        | No               | 1.00              |                   |                     |                     |
|                      |                               | Yes       | No               | 0.15 (0.02, 1.17) | -1.10             | -1.20 (-2.61, 0.22) |                     |
|                      |                               | Yes       | Yes              | 0.88 (0.59, 1.33) | -0.12             |                     |                     |
|                      |                               |           | Yes              | No                | 0.46 (0.12, 1.86) |                     |                     |
|                      |                               |           | Yes              | Yes               | 0.68 (0.22, 2.09) | 0.21                | 0.33 (-0.66, 1.32)  |

Supplemental Material, Table S3

| Chr.      | Gene*        | rs number         | Solvent Exposure  | SNP               | OR (95% CI)         | PD                 | RERI (95% CI)       |                     |  |
|-----------|--------------|-------------------|-------------------|-------------------|---------------------|--------------------|---------------------|---------------------|--|
| 7         | <i>TCA-β</i> | rs17133575        | No                | No                | 1.00                |                    |                     |                     |  |
|           |              |                   |                   | Yes               | 1.10 (0.73, 1.68)   | 0.10               |                     |                     |  |
|           |              |                   | Yes               | No                | 0.75 (0.30, 1.88)   |                    |                     |                     |  |
|           |              |                   |                   | Yes               | 0.38 (0.04, 3.29)   | -0.37              | -0.47 (-1.63, 0.70) |                     |  |
|           |              |                   |                   | No                | No                  | 1.00               |                     |                     |  |
|           |              |                   |                   |                   | Yes                 | 0.93 (0.62, 1.40)  | -0.07               |                     |  |
| 10        | <i>IL2RA</i> | rs2104286         | No                | No                | 1.00                |                    |                     |                     |  |
|           |              |                   |                   | Yes               | 0.99 (0.67, 1.47)   | -0.01              |                     |                     |  |
|           |              |                   | Yes               | No                | 0.75 (0.26, 2.21)   |                    |                     |                     |  |
|           |              |                   |                   | Yes               | 0.53 (0.14, 2.07)   | -0.22              | -0.21 (-1.33, 0.90) |                     |  |
|           |              |                   |                   | No                | No                  | 1.00               |                     |                     |  |
|           |              |                   |                   |                   | Yes                 | 1.09 (0.73, 1.62)  | 0.09                |                     |  |
| 12        | <i>VDR</i>   | rs7975128         | No                | No                | 1.00                |                    |                     |                     |  |
|           |              |                   |                   | Yes               | 0.87 (0.20, 3.81)   |                    |                     |                     |  |
|           |              |                   | Yes               | No                | 0.54 (0.18, 1.66)   | -0.33              | -0.41 (-1.90, 1.07) |                     |  |
|           |              |                   |                   | Yes               | 0.58 (0.19, 1.80)   | -0.53              | -0.66 (-2.35, 1.04) |                     |  |
|           |              |                   |                   | No                | No                  | 1.00               |                     |                     |  |
|           |              |                   |                   |                   | Yes                 | 1.13 (0.72, 1.76)  | 0.13                |                     |  |
|           |              |                   | Yes               | No                | 1.11 (0.28, 4.39)   |                    |                     |                     |  |
|           |              |                   |                   | Yes               | 0.52 (0.18, 1.49)   | -2.26              | -2.56 (-7.09, 1.97) |                     |  |
|           |              |                   |                   | No                | No                  | 1.00               |                     |                     |  |
|           |              |                   |                   |                   | Yes                 | 1.30 (0.83, 2.04)  | 0.30                |                     |  |
|           |              |                   | rs2248098         | No                | No                  | 1.00               |                     |                     |  |
|           |              |                   |                   |                   | Yes                 | 2.78 (0.58, 13.40) |                     |                     |  |
|           |              |                   |                   | Yes               | No                  | 0.41 (0.12, 1.39)  | -0.74               | -1.02 (-2.45, 0.42) |  |
|           |              |                   |                   |                   | Yes                 | 0.49 (0.16, 1.48)  | -1.28               | -1.48 (-3.89, 0.92) |  |
|           |              |                   |                   |                   | No                  | No                 | 1.00                |                     |  |
|           |              |                   |                   |                   |                     | Yes                | 1.21 (0.82, 1.77)   | 0.21                |  |
|           |              |                   | rs2239182         | No                | No                  | 1.00               |                     |                     |  |
|           |              |                   |                   |                   | Yes                 | 1.76 (0.47, 6.55)  |                     |                     |  |
|           |              |                   |                   | Yes               | No                  | 0.57 (0.13, 2.53)  |                     |                     |  |
|           |              |                   |                   |                   | Yes                 | 0.49 (0.16, 1.48)  | -1.28               | -1.48 (-3.89, 0.92) |  |
|           |              |                   |                   |                   | No                  | No                 | 1.00                |                     |  |
|           |              |                   |                   |                   |                     | Yes                | 0.87 (0.58, 1.29)   | -0.13               |  |
|           |              |                   | rs2107301         | No                | No                  | 1.00               |                     |                     |  |
|           |              |                   |                   |                   | Yes                 | 1.28 (0.88, 1.86)  | 0.28                |                     |  |
| Yes       | No           | 1.15 (0.38, 3.49) |                   |                   |                     |                    |                     |                     |  |
|           | Yes          | 0.41 (0.12, 1.39) |                   | -0.74             | -1.02 (-2.45, 0.42) |                    |                     |                     |  |
|           | No           | No                |                   | 1.00              |                     |                    |                     |                     |  |
|           |              | Yes               |                   | 1.21 (0.82, 1.77) | 0.21                |                    |                     |                     |  |
| rs1540339 | No           | No                | 1.00              |                   |                     |                    |                     |                     |  |
|           |              | Yes               | 1.76 (0.47, 6.55) |                   |                     |                    |                     |                     |  |
|           | Yes          | No                | 0.57 (0.13, 2.53) |                   |                     |                    |                     |                     |  |
|           |              | Yes               | 0.49 (0.16, 1.48) | -1.28             | -1.48 (-3.89, 0.92) |                    |                     |                     |  |
|           |              | No                | No                | 1.00              |                     |                    |                     |                     |  |
|           |              |                   | Yes               | 0.87 (0.58, 1.29) | -0.13               |                    |                     |                     |  |
| rs2239179 | No           | No                | 1.00              |                   |                     |                    |                     |                     |  |
|           |              | Yes               | 0.57 (0.13, 2.53) |                   |                     |                    |                     |                     |  |
|           | Yes          | No                | 0.59 (0.22, 1.56) | 0.02              | 0.15 (-0.86, 1.16)  |                    |                     |                     |  |
|           |              | Yes               | 0.59 (0.22, 1.56) | 0.02              | 0.15 (-0.86, 1.16)  |                    |                     |                     |  |
|           |              | No                | No                | 1.00              |                     |                    |                     |                     |  |
|           |              |                   | Yes               | 1.12 (0.75, 1.67) | 0.12                |                    |                     |                     |  |
| rs2189480 | No           | No                | 1.00              |                   |                     |                    |                     |                     |  |
|           |              | Yes               | 1.12 (0.75, 1.67) | 0.12              |                     |                    |                     |                     |  |
|           | Yes          | No                | 0.60 (0.16, 2.19) |                   |                     |                    |                     |                     |  |
|           |              | Yes               | 0.89 (0.30, 2.64) | 0.29              | 0.16 (-1.03, 1.35)  |                    |                     |                     |  |
|           |              | No                | No                | 1.00              |                     |                    |                     |                     |  |
|           |              |                   | Yes               | 0.98 (0.66, 1.45) | -0.02               |                    |                     |                     |  |
| rs3819545 | No           | No                | 1.00              |                   |                     |                    |                     |                     |  |
|           |              | Yes               | 0.98 (0.66, 1.45) | -0.02             |                     |                    |                     |                     |  |
|           | Yes          | 0.89 (0.23, 3.49) |                   |                   |                     |                    |                     |                     |  |

Supplemental Material, Table S3

| Chr. | Gene* | rs number  | Solvent Exposure | SNP | OR (95% CI)       | PD    | RERI (95% CI)       |
|------|-------|------------|------------------|-----|-------------------|-------|---------------------|
|      |       |            |                  | Yes | 0.55 (0.19, 1.57) | -0.34 | -0.31 (-1.64, 1.02) |
|      |       | rs3782905  | No               | No  | 1.00              |       |                     |
|      |       |            |                  | Yes | 0.83 (0.57, 1.22) | -0.17 |                     |
|      |       |            | Yes              | No  | 0.55 (0.16, 1.90) |       |                     |
|      |       |            |                  | Yes | 0.48 (0.14, 1.65) | -0.06 | 0.11 (-0.83, 1.04)  |
|      |       | rs2239186  | No               | No  | 1.00              |       |                     |
|      |       |            |                  | Yes | 1.01 (0.67, 1.51) | 0.01  |                     |
|      |       |            | Yes              | No  | 0.45 (0.15, 1.34) |       |                     |
|      |       |            |                  | Yes | 1.11 (0.33, 3.72) | 0.65  | 0.65 (-0.72, 2.01)  |
|      |       | rs2228570  | No               | No  | 1.00              |       |                     |
|      |       |            |                  | Yes | 0.85 (0.57, 1.27) | -0.15 |                     |
|      |       |            | Yes              | No  | 1.16 (0.34, 3.94) |       |                     |
|      |       |            |                  | Yes | 0.36 (0.11, 1.21) | -0.80 | -0.65 (-2.16, 0.86) |
|      |       | rs2254210  | No               | No  | 1.00              |       |                     |
|      |       |            |                  | Yes | 1.15 (0.78, 1.71) | 0.15  |                     |
|      |       |            | Yes              | No  | 0.72 (0.23, 2.26) |       |                     |
|      |       |            |                  | Yes | 0.67 (0.21, 2.10) | -0.05 | -0.20 (-1.31, 0.92) |
|      |       | rs2238136  | No               | No  | 1.00              |       |                     |
|      |       |            |                  | Yes | 0.95 (0.64, 1.42) | -0.05 |                     |
|      |       |            | Yes              | No  | 0.10 (0.01, 0.85) |       |                     |
|      |       |            |                  | Yes | 1.75 (0.59, 5.16) | 1.65  | 1.70 (-0.20, 3.59)  |
|      |       | rs2853564  | No               | No  | 1.00              |       |                     |
|      |       |            |                  | Yes | 1.48 (0.97, 2.24) | 0.48  |                     |
|      |       |            | Yes              | No  | 1.02 (0.32, 3.31) |       |                     |
|      |       |            |                  | Yes | 0.61 (0.17, 2.10) | -0.41 | -0.89 (-2.43, 0.65) |
|      |       | rs4760648  | No               | No  | 1.00              |       |                     |
|      |       |            |                  | Yes | 0.81 (0.54, 1.21) | -0.19 |                     |
|      |       |            | Yes              | No  | 0.55 (0.12, 2.46) |       |                     |
|      |       |            |                  | Yes | 0.55 (0.19, 1.60) | 0.00  | 0.19 (-0.80, 1.18)  |
|      |       | rs11168287 | No               | No  | 1.00              |       |                     |
|      |       |            |                  | Yes | 1.13 (0.73, 1.77) | 0.13  |                     |
|      |       |            | Yes              | No  | 0.52 (0.09, 3.01) |       |                     |
|      |       |            |                  | Yes | 0.83 (0.30, 2.32) | 0.31  | 0.18 (-1.06, 1.41)  |
|      |       | rs4328262  | No               | No  | 1.00              |       |                     |
|      |       |            |                  | Yes | 1.11 (0.74, 1.69) | 0.11  |                     |
|      |       |            | Yes              | No  | 0.17 (0.02, 1.56) |       |                     |
|      |       |            |                  | Yes | 0.97 (0.37, 2.50) | 0.80  | 0.68 (-0.31, 1.67)  |
|      |       | rs4237855  | No               | No  | 1.00              |       |                     |
|      |       |            |                  | Yes | 0.78 (0.52, 1.18) | -0.22 |                     |
|      |       |            | Yes              | No  | 0.25 (0.05, 1.29) |       |                     |
|      |       |            |                  | Yes | 0.89 (0.33, 2.39) | 0.64  | 0.86 (-0.06, 1.78)  |
|      |       | rs7136534  | No               | No  | 1.00              |       |                     |
|      |       |            |                  | Yes | 1.24 (0.84, 1.83) | 0.24  |                     |

Supplemental Material, Table S3

| Chr.       | Gene*      | rs number | Solvent Exposure  | SNP   | OR (95% CI)         | PD    | RERI (95% CI)       |
|------------|------------|-----------|-------------------|-------|---------------------|-------|---------------------|
| 18         | <i>MBP</i> | rs7299460 | Yes               | No    | 0.82 (0.28, 2.42)   |       |                     |
|            |            |           |                   | Yes   | 0.61 (0.17, 2.17)   | -0.22 | -0.46 (-1.67, 0.75) |
|            |            |           | No                | No    | 1.00                |       |                     |
|            |            |           |                   | Yes   | 1.23 (0.84, 1.80)   | 0.23  |                     |
|            |            |           | Yes               | No    | 0.87 (0.29, 2.57)   |       |                     |
|            |            |           |                   | Yes   | 0.58 (0.16, 2.03)   | -0.29 | -0.52 (-1.74, 0.70) |
|            |            | rs4760658 | No                | No    | 1.00                |       |                     |
|            |            |           |                   | Yes   | 1.17 (0.78, 1.75)   | 0.17  |                     |
|            |            |           | Yes               | No    | 1.01 (0.31, 3.33)   |       |                     |
|            |            |           |                   | Yes   | 0.49 (0.14, 1.66)   | -0.52 | -0.70 (-2.14, 0.75) |
|            |            |           | No                | No    | 1.00                |       |                     |
|            |            |           |                   | Yes   | 0.90 (0.59, 1.36)   | -0.10 |                     |
|            |            | rs17026   | Yes               | No    | 0.65 (0.16, 2.71)   |       |                     |
|            |            |           |                   | Yes   | 0.58 (0.20, 1.68)   | -0.06 | 0.04 (-1.10, 1.18)  |
|            |            |           | No                | No    | 1.00                |       |                     |
|            |            |           |                   | Yes   | 1.15 (0.79, 1.67)   | 0.15  |                     |
|            |            |           | Yes               | No    | 0.44 (0.13, 1.48)   |       |                     |
|            |            |           |                   | Yes   | 1.22 (0.38, 3.88)   | 0.78  | 0.63 (-0.85, 2.12)  |
|            |            | rs470724  | No                | No    | 1.00                |       |                     |
|            |            |           |                   | Yes   | 1.20 (0.82, 1.76)   | 0.20  |                     |
|            |            |           | Yes               | No    | 0.41 (0.12, 1.34)   |       |                     |
|            |            |           |                   | Yes   | 1.47 (0.45, 4.81)   | 1.07  | 0.87 (-0.89, 2.63)  |
|            |            |           | No                | No    | 1.00                |       |                     |
|            |            |           |                   | Yes   | 1.36 (0.87, 2.12)   | 0.36  |                     |
|            |            | rs470550  | Yes               | No    | 1.44 (0.37, 5.64)   |       |                     |
|            |            |           |                   | Yes   | 0.58 (0.19, 1.78)   | -0.86 | -1.22 (-3.41, 0.98) |
|            |            |           | No                | No    | 1.00                |       |                     |
|            |            |           |                   | Yes   | 0.65 (0.44, 0.96)   | -0.35 |                     |
|            |            |           | Yes               | No    | 1.02 (0.32, 3.32)   |       |                     |
|            |            |           |                   | Yes   | 0.31 (0.09, 1.03)   | -0.71 | -0.36 (-1.65, 0.92) |
| rs11661054 | No         | No        | 1.00              |       |                     |       |                     |
|            |            | Yes       | 1.11 (0.74, 1.66) | 0.11  |                     |       |                     |
|            | Yes        | No        | 0.65 (0.16, 2.73) |       |                     |       |                     |
|            |            | Yes       | 0.73 (0.26, 2.02) | 0.07  | -0.03 (-1.19, 1.13) |       |                     |
|            | No         | No        | 1.00              |       |                     |       |                     |
|            |            | Yes       | 0.75 (0.52, 1.10) | -0.25 |                     |       |                     |
| rs4890785  | Yes        | No        | 0.66 (0.19, 2.34) |       |                     |       |                     |
|            |            | Yes       | 0.52 (0.17, 1.63) | -0.14 | 0.11 (-0.94, 1.15)  |       |                     |
|            | No         | No        | 1.00              |       |                     |       |                     |
|            |            | Yes       | 1.18 (0.80, 1.75) | 0.18  |                     |       |                     |
|            | Yes        | No        | 0.74 (0.19, 2.96) |       |                     |       |                     |
|            |            | Yes       | 0.70 (0.25, 2.00) | -0.04 | -0.22 (-1.51, 1.06) |       |                     |
| rs9675994  | No         | No        | 1.00              |       |                     |       |                     |

Supplemental Material, Table S3

| Chr. | Gene* | rs number  | Solvent Exposure | SNP | OR (95% CI)       | PD    | RERI (95% CI)       |
|------|-------|------------|------------------|-----|-------------------|-------|---------------------|
|      |       |            |                  | Yes | 1.01 (0.68, 1.50) | 0.01  |                     |
|      |       |            | Yes              | No  | 0.58 (0.21, 1.62) |       |                     |
|      |       | rs8090438  |                  | Yes | 0.78 (0.21, 2.88) | 0.20  | 0.19 (-0.95, 1.34)  |
|      |       |            | No               | No  | 1.00              |       |                     |
|      |       |            |                  | Yes | 0.95 (0.63, 1.42) | -0.05 |                     |
|      |       |            | Yes              | No  | 0.69 (0.17, 2.82) |       |                     |
|      |       | rs8094402  |                  | Yes | 0.64 (0.22, 1.87) | -0.05 | 0.00 (-1.17, 1.18)  |
|      |       |            | No               | No  | 1.00              |       |                     |
|      |       |            |                  | Yes | 1.24 (0.84, 1.82) | 0.24  |                     |
|      |       |            | Yes              | No  | 1.07 (0.33, 3.42) |       |                     |
|      |       | rs12456341 |                  | Yes | 0.48 (0.14, 1.63) | -0.59 | -0.83 (-2.30, 0.65) |
|      |       |            | No               | No  | 1.00              |       |                     |
|      |       |            |                  | Yes | 0.96 (0.65, 1.43) | -0.04 |                     |
|      |       |            | Yes              | No  | 0.33 (0.09, 1.29) |       |                     |
|      |       | rs17576751 |                  | Yes | 1.37 (0.43, 4.37) | 1.03  | 1.07 (-0.52, 2.66)  |
|      |       |            | No               | No  | 1.00              |       |                     |
|      |       |            |                  | Yes | 1.06 (0.71, 1.57) | 0.06  |                     |
|      |       |            | Yes              | No  | 1.08 (0.29, 4.03) |       |                     |
|      |       | rs3794848  |                  | Yes | 0.58 (0.18, 1.83) | -0.50 | -0.55 (-2.16, 1.05) |
|      |       |            | No               | No  | 1.00              |       |                     |
|      |       |            |                  | Yes | 1.21 (0.82, 1.78) | 0.21  |                     |
|      |       |            | Yes              | No  | 0.52 (0.17, 1.57) |       |                     |
|      |       | rs4890875  |                  | Yes | 1.22 (0.34, 4.40) | 0.70  | 0.49 (-1.13, 2.12)  |
|      |       |            | No               | No  | 1.00              |       |                     |
|      |       |            |                  | Yes | 1.02 (0.69, 1.49) | 0.02  |                     |
|      |       |            | Yes              | No  | 0.46 (0.11, 1.85) |       |                     |
|      |       | rs595997   |                  | Yes | 0.95 (0.32, 2.83) | 0.49  | 0.48 (-0.71, 1.67)  |
|      |       |            | No               | No  | 1.00              |       |                     |
|      |       |            |                  | Yes | 0.74 (0.50, 1.10) | -0.26 |                     |
|      |       |            | Yes              | No  | 0.97 (0.29, 3.25) |       |                     |
|      |       | rs2974260  |                  | Yes | 0.36 (0.11, 1.19) | -0.61 | -0.35 (-1.63, 0.93) |
|      |       |            | No               | No  | 1.00              |       |                     |
|      |       |            |                  | Yes | 1.90 (1.23, 2.91) | 0.90  |                     |
|      |       |            | Yes              | No  | 0.93 (0.27, 3.25) |       |                     |
|      |       | rs2051344  |                  | Yes | 0.91 (0.28, 2.91) | -0.02 | -0.92 (-2.62, 0.79) |
|      |       |            | No               | No  | 1.00              |       |                     |
|      |       |            |                  | Yes | 0.85 (0.58, 1.26) | -0.15 |                     |
|      |       |            | Yes              | No  | 0.40 (0.13, 1.23) |       |                     |
|      |       | rs470681   |                  | Yes | 0.98 (0.30, 3.18) | 0.58  | 0.73 (-0.46, 1.91)  |
|      |       |            | No               | No  | 1.00              |       |                     |
|      |       |            |                  | Yes | 0.77 (0.52, 1.12) | -0.23 |                     |
|      |       |            | Yes              | No  | 0.48 (0.12, 1.96) |       |                     |
|      |       |            |                  | Yes | 0.61 (0.22, 1.66) | 0.13  | 0.36 (-0.52, 1.24)  |

Supplemental Material, Table S3

| Chr.   | Gene*             | rs number         | Solvent Exposure  | SNP               | OR (95% CI)        | PD                | RERI (95% CI)       |  |
|--------|-------------------|-------------------|-------------------|-------------------|--------------------|-------------------|---------------------|--|
| 19     | <i>APOE</i>       | rs12967023        | No                | No                | 1.00               |                   |                     |  |
|        |                   |                   |                   | Yes               | 1.68 (1.12, 2.50)  | 0.68              |                     |  |
|        |                   |                   | Yes               | No                | 1.22 (0.42, 3.60)  |                   |                     |  |
|        |                   |                   |                   | Yes               | 0.46 (0.11, 1.89)  | -0.76             | -1.44 (-3.09, 0.22) |  |
|        |                   |                   | rs4890788         | No                | No                 | 1.00              |                     |  |
|        |                   |                   |                   |                   | Yes                | 0.95 (0.64, 1.41) | -0.05               |  |
|        |                   | Yes               |                   | No                | 0.44 (0.12, 1.54)  |                   |                     |  |
|        |                   |                   |                   | Yes               | 1.06 (0.34, 3.26)  | 0.62              | 0.67 (-0.56, 1.91)  |  |
|        |                   | rs7232502         |                   | No                | No                 | 1.00              |                     |  |
|        |                   |                   |                   |                   | Yes                | 1.23 (0.81, 1.84) | 0.23                |  |
|        |                   |                   | Yes               | No                | 1.72 (0.50, 5.94)  |                   |                     |  |
|        |                   |                   |                   | Yes               | 0.40 (0.12, 1.31)  | -1.32             | -1.55 (-3.80, 0.71) |  |
|        |                   |                   | rs8096433         | No                | No                 | 1.00              |                     |  |
|        |                   |                   |                   |                   | Yes                | 1.96 (1.25, 3.07) | 0.96                |  |
|        |                   | Yes               |                   | No                | 3.15 (0.87, 11.47) |                   |                     |  |
|        |                   |                   |                   | Yes               | 0.44 (0.13, 1.42)  | -2.72             | -3.68 (-8.00, 0.65) |  |
|        |                   | rs17660901        |                   | No                | No                 | 1.00              |                     |  |
|        |                   |                   |                   |                   | Yes                | 0.71 (0.48, 1.04) | -0.29               |  |
|        |                   |                   | Yes               | No                | 0.28 (0.08, 0.95)  |                   |                     |  |
|        |                   |                   |                   | Yes               | 1.44 (0.44, 4.75)  | 1.16              | 1.45 (-0.23, 3.13)  |  |
|        |                   |                   | rs429358          | No                | No                 | 1.00              |                     |  |
| Yes    | 0.93 (0.60, 1.43) |                   |                   |                   | -0.07              |                   |                     |  |
| Yes    | No                | 0.56 (0.21, 1.45) |                   |                   |                    |                   |                     |  |
|        | Yes               | 1.12 (0.21, 5.90) |                   | 0.56              | 0.64 (-1.31, 2.58) |                   |                     |  |
| rs7412 | No                | No                |                   | 1.00              |                    |                   |                     |  |
|        |                   | Yes               |                   | 0.90 (0.53, 1.53) | -0.10              |                   |                     |  |
|        | Yes               | No                | 0.56 (0.22, 1.44) |                   |                    |                   |                     |  |
|        |                   | Yes               | 1.25 (0.21, 7.65) | 0.69              | 0.79 (-1.55, 3.13) |                   |                     |  |

Abbreviations: *APOE*, Apolipoprotein E; CI=confidence interval; *HLA*, Human leukocyte antigen; *IL2RA*, Interleukin-2 receptor alpha; *IL7RA*, Interleukin-7 receptor alpha; MAF, minor allele frequency; *MBP*, Myelin basic protein; OR, prevalence odds ratio; PD, prevalence difference; SNP, single nucleotide polymorphism; *TCA-β*, T cell antigen receptor beta; *TNFα*, Tumor necrosis factor alpha; *TNFβ*, Tumor necrosis factor beta; *VDR*, Vitamin D receptor.
